# Supplementary material for: Imaging Amyloplasts in the Developing Endosperm of Barley and Rice
Source: PubMed Central journal article supplement (PMC6403327; doi:10.1038/s41598-019-40424-w), 2019-03-06
Supplement: 41598_2019_40424_MOESM1_ESM.pdf [file 41598_2019_40424_MOESM1_ESM.pdf]

# **Imaging Amyloplasts in the Developing Endosperm of Barley and Rice**

Ryo Matsushima and Hiroshi Hisano

Institute of Plant Science and Resources,  
Okayama University, Kurashiki, 710-0046, Japan

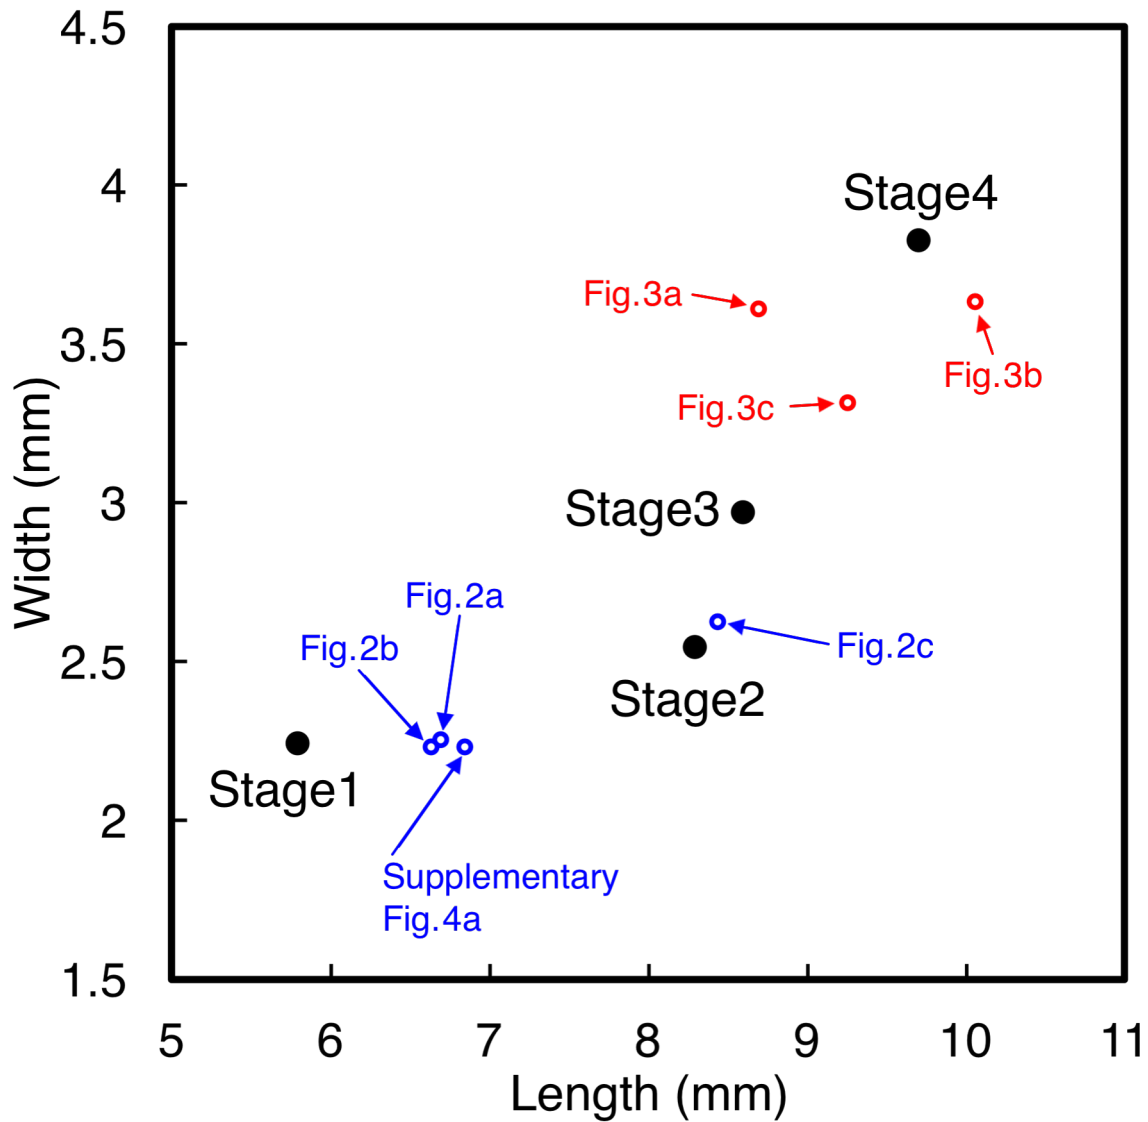

**Supplementary Figure 1.** Length and width of developing seeds at Stages 1-4. Black spots indicate the developing seeds of each stage in Figure 1, blue spots from Figure 2 and Supplementary Figure 4, and red spots from Figure 3.

**(a)** *TP-GFP*

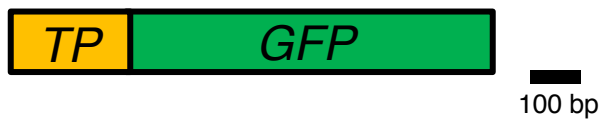

**(b)** *SSG6-GFP*

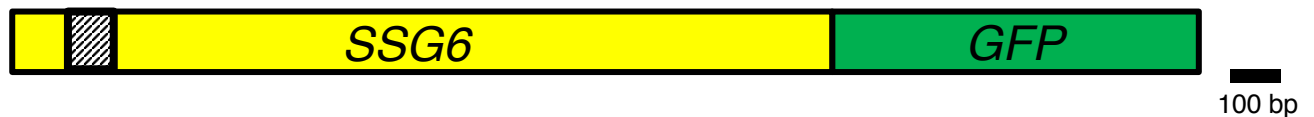

**Supplementary Figure 2.** Chimeric genes used for the construction of *TP-GFP* and *SSG6-GFP* plants. **(a)** Schematic view of the chimeric gene *TP-GFP*, encoding GFP fused to the transit peptide (TP) of the granule-bound starch synthase I. **(b)** Schematic view of the chimeric gene *SSG6-GFP*, encoding GFP fused to SSG6. The shaded box indicates the putative transmembrane domain. In the transgenic plants, *TP-GFP* and *SSG6-GFP* are expressed under the regulation of the maize *Ubiquitin 1* promoter.

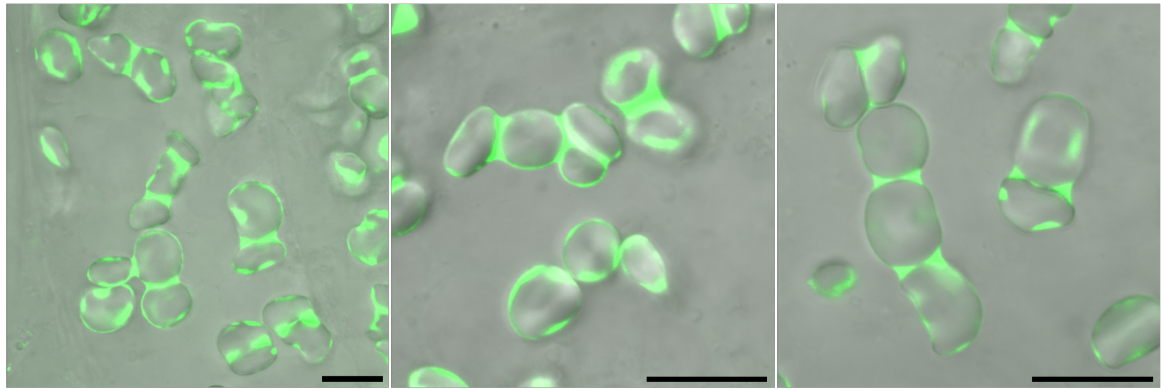

**Supplementary Figure 3.** Merged GFP and differential interference contrast images from slices prepared from early developing *TP-GFP* barley seeds. The images were obtained from three different seeds. The amyloplasts contain multiple starch grains. Scale bars, 10  $\mu\text{m}$ .

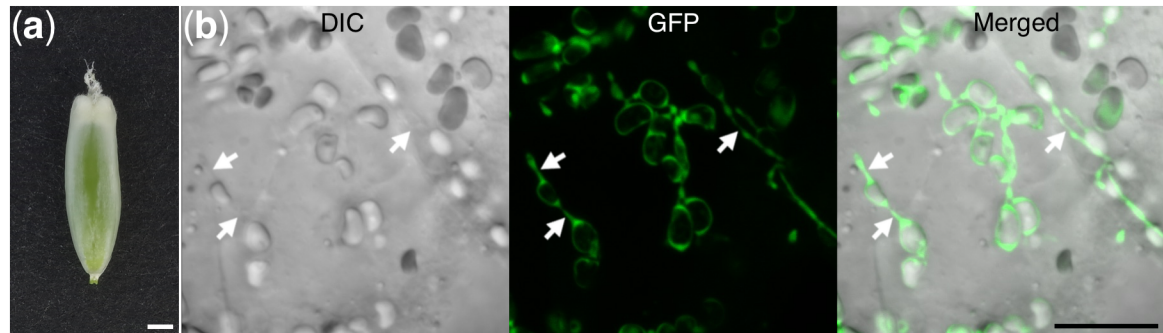

**Supplementary Figure 4.** Cylindrical GFP signals that interconnect SGs. **(a)** Stage 1 seed. **(b)** Differential interference contrast (DIC), GFP, and merged images of the sections prepared from **(a)**. Six confocal optical sections were taken at 0.42- $\mu\text{m}$  intervals along the z axis. Arrows indicate stromule-like structures of amyloplasts. Scale bars, 1 mm in a; 10  $\mu\text{m}$  in b.

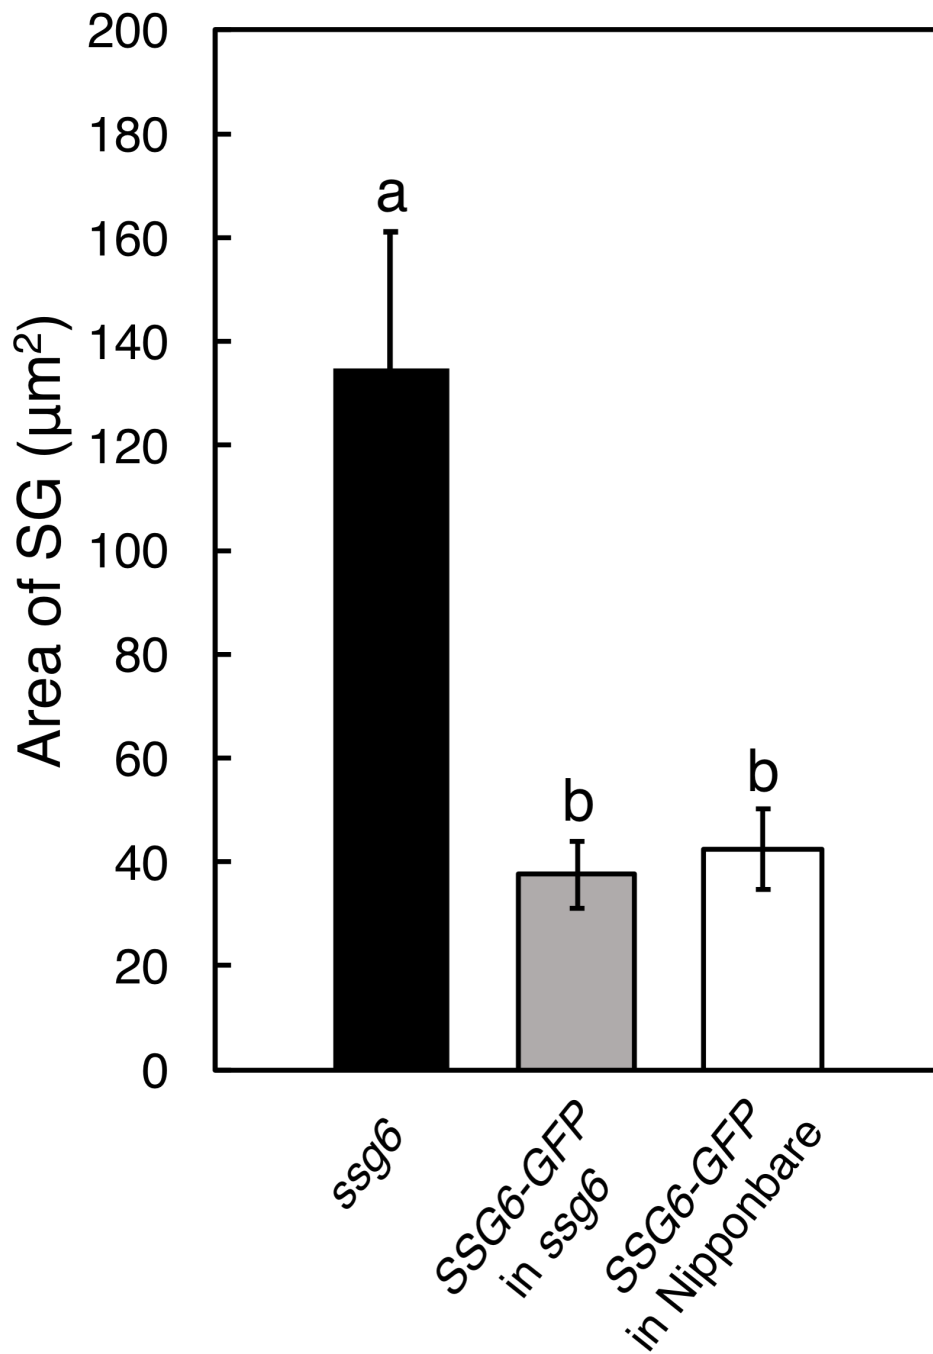

**Supplementary Figure 5.** Quantification of the SG areas in *ssg6*, *ssg6* plants expressing *SSG6-GFP*, and wild-type (Nipponbare) rice expressing *SSG6-GFP* ( $n = 8$  each). Data are given as means  $\pm$  SD. Statistical comparisons were performed using a Tukey test. Different letters represent statistically significant differences ( $p < 0.01$ ).

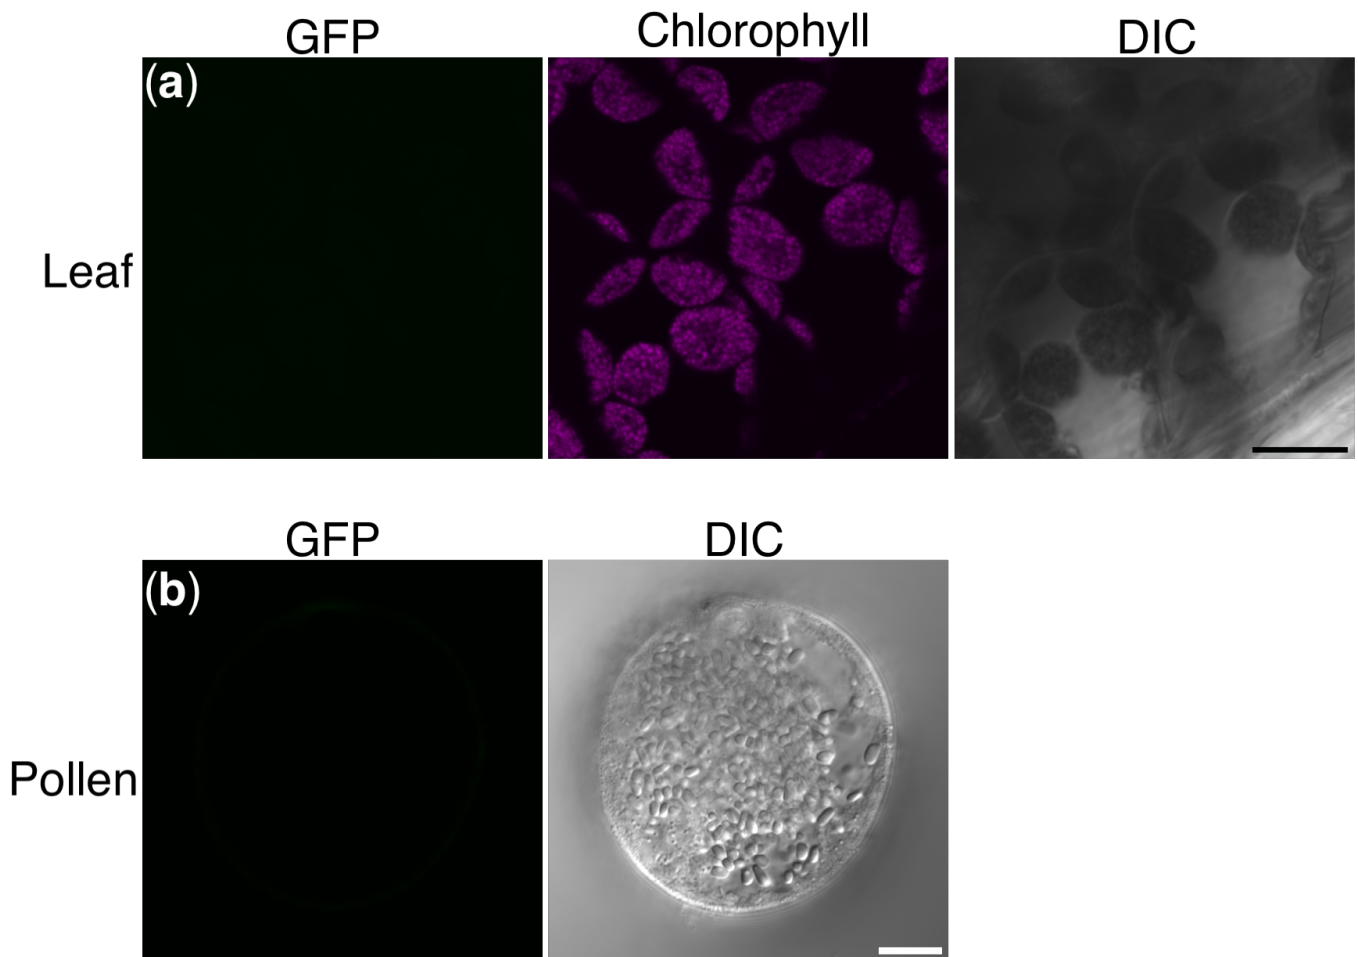

**Supplementary Figure 6.** Fluorescence images of leaf and pollen of non-transgenic barley. **(a)** GFP and chlorophyll autofluorescence and differential interference contrast (DIC) images of non-transgenic barley leaf. **(b)** GFP and DIC images of non-transgenic barley pollen. In both of leaf and pollen, no GFP signal was detected under the same detection condition as Figure 7. Scale bars, 10  $\mu\text{m}$ .

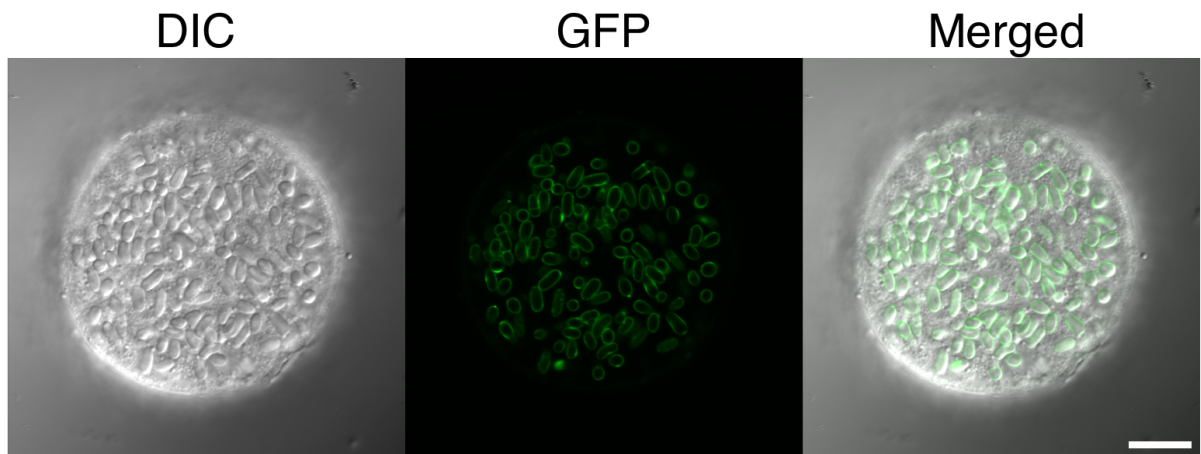

**Supplementary Figure 7.** Fluorescence images of pollen from *TP-GFP* rice. Differential interference contrast (DIC), GFP, and merged images of *TP-GFP* rice pollen. Scale bars, 10  $\mu\text{m}$ .



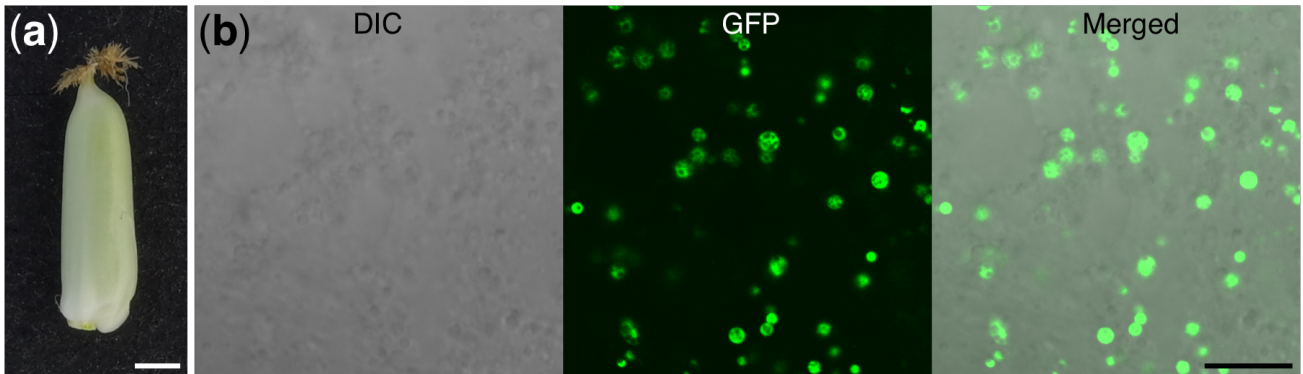

**Supplementary Figure 8.** Fluorescence image of the lateral side of the endosperm in transgenic *TP-GFP* rice. **(a)** Rice seed at 4 DAF. **(b)** Differential interference contrast (DIC), GFP, and merged images of the sections prepared from **(a)**. Amyloplasts in the lateral side of the endosperm was small and sparse. Scale bars, 1 mm in a; 10  $\mu$ m in b.
